# Supplementary material for: A flexible smart membrane consisting of GO composite fibres and upconversion MSNs for microRNA detection
Source: Royal Society of Chemistry journal article supplement (doi:10.1039/c9cc02907a), 2019-01-01
Supplement: c9cc02907a1.pdf [file c9cc02907a1.pdf]

## Supporting Information

### A Flexible Smart Membrane Consisting of GO Composite Fibres and Upconversion MSNs for microRNA Detection

Tongxu Gu,<sup>a</sup> Zhaohui Ren,<sup>a</sup> Xiang Li,<sup>\*a</sup> Jie Huang,<sup>b</sup> and Gaorong Han<sup>a</sup>

<sup>a</sup> State Key Laboratory of Silicon Materials, School of Materials Science and Engineering, Zhejiang University, Hangzhou, Zhejiang 310027, People's Republic of China.

<sup>b</sup> Department of Mechanical Engineering, University College London, Torrington Place, London WC1E 7JE, UK

Corresponding Author: Dr. Xiang Li, Email: xiang.li@zju.edu.cn

#### Materials

Tetraethoxysilane (TEOS), cetyltrimethylammonium bromide (CTAB), ethanol, calcium acetate monohydrate (99%), anhydrous N,N-dimethyl-formamide (DMF), tetrahydrofuran(99%) were acquired from Sinopharm Chemical Reagent Co., Ltd. Lysine, n-octane (99%), 2, 2'-azobis(2-amidinopropane) dihydrochloride (AIBA), styrene (99%, contains 4-tert-butylcatechol as stabilizer), trifluoroacetic acid (TFA, 99.5%), 1-ethyl-3-(3-(dimethylamino)propyl) carbodiimide hydrochloride (EDC), N-hydroxysulfosuccinimide (sulfo-NHS), 3-aminopropyltriethoxysilane (APTES) were purchased from Sigma-Aladdin Industrial Co., Ltd. Ytterbium(III) acetate hydrate (99.9%), holmium(III) acetate hydrate (99.9%) were purchased from Thermo Fisher Scientific. All chemicals were used as received without further purification. TPU was purchased by Bayer A.G. (Germany).

DNA oligonucleotides with a concentration of 100 nM were ordered from Sangon Biotech (Shanghai) Co., Ltd., and the sequence are listed in Table 1.

#### Characterization

The morphology of materials was investigated via a Hitachi SU-70 field-emission scanning electron microscopy (FESEM) and a FEI Tecnai F20 high-resolution transmission electron microscope (HRTEM). The X-ray diffraction (XRD) pattern was recorded by using a Thermo ARL X'TRA powder diffractometer. Surface textural characterization was implemented according to the Brunauer–Emmett–Teller (BET) method by using a Coulter OMNISORP-100 apparatus. FTIR spectra were evaluated using a Perkin-Elmer 580B infrared spectrophotometer. UV/Vis absorption values were measured with a TU-1810 spectrophotometer. The upconversion photoluminescence spectra were recorded using a fluorescence spectrophotometer (PL, FLSP920, Edinburgh) under the excitation of a 980 nm laser.

#### Synthesis of CaF<sub>2</sub>: Yb/Ho @MSN

100 mg CTAB were dissolved in 30 ml deionized water, and stirred at 60°C. After stirred magnetically for 30 min, 25.2 ml octane, 1000 mg TEOS, 22 mg lysine, styrene (30 mg/ml) and AIBA (0.84 mg/ml) were subsequently added to the system and stirred for 3 h. After 4 h, the solution was cooled down to the ambient temperature. The products were collected by centrifugation at 10000 rpm for 10 min and then washed 3 times. The template was completely removed by heat treatment at 550°C under atmospheric conditions. To incorporate CaF<sub>2</sub>:RE<sup>3+</sup> nanocrystals within mesoporous silica nanoparticles, a precursor solution should be prepared beforehand. Ca(OAc)<sub>2</sub>, Yb(OAc)<sub>3</sub>, and Ho(OAc)<sub>3</sub> were dissolved in deionized water to make a 0.5 M solution, and added with 12 ml TFA under stirring for 24 h. Subsequently, 300 mg MSN was added into 20 ml precursor solution and immersed for 24 h under stirring at 35°C. The particles were then centrifugated at 8000 rpm for 5 min, and stood for 4 h at room temperature. After being air-dried at 80°C overnights, the particles were further calcined at 600°C for 3 h.

### **Conjugation of CaF<sub>2</sub>: Yb/Ho @MSN with probe oligonucleotides**

100 mg CaF<sub>2</sub>: Yb/Ho @MSN was dispersed in 100 ml ethanol under sonication for 10 min, and then 3 ml APTES was added under stirring at 50°C for 24 h. The samples were collected by centrifugation and dried at 80°C. 100 µl ssDNA probe was dissolved in 5 ml PBS solution. 0.8 ml EDC (2 mg/ml) and 0.4 ml NHS (2 mg/ml) were added and the reaction was allowed to react for 30 min at 37°C under shaking. 10 mg CaF<sub>2</sub>: Yb/Ho @MSN which modified with amino group was then added, and the reaction was incubated for 12 h. After reaction, the products were centrifuged, washed with PBS and then resuspended in 5 ml PBS solution.

### **Preparation of smart substrate**

The precursor solution for electrospinning was prepared by a sol-gel method. In a typical process, 15 wt% TPU dissolved in 10 ml DMF and 10 ml THF, all the stuff had been stirring for 3 h at room temperature until got homogeneous spinnable precursor sols. For the electrospinning procedure, the electrospinning sol was fed into the conducting nozzle (2.5 mm ID) using an infusion pump (KDS-100, KD Scientific, USA) at a constant flow rate of 1 mL/h. The distance between the needle tip and the grounded aluminum foil was 12.5 cm. And the voltage was set to be 6 kV (PS/FC30P04.0-22, Glassman High voltage Inc., USA). The as-spun fibers were dried at 37 °C for 12 h.

The TPU fiber substrate was cut into the area of 0.8 cm x 0.5 cm small pieces, and added in 2 mg/ml GO solution under magnetic stirring for 24h at room temperature. The samples were dried at 37 °C. These small pieces were added in the solution which contained CaF<sub>2</sub>: Yb/Ho @MSN-ssDNA probe as-prepared under gentle shaking for 12h at 37 °C. Finally, the substrate was washed with PBS solution for 3 times.

### **Hybridization assay and PL measurements**

The smart substrates were incubated with different concentration of target analog miRNA at 37°C under shaking for 1 h in PBS and 10 vol% fetal bovine serum, and then washed with PBS solution gently. Photoluminescence spectrum measurements were done all these smart substrates at 980 nm excitation.

**Table S1. Structural parameters of nanoparticles before and after CaF<sub>2</sub>: Yb/Ho crystals combination**

|                              | Surface area<br>[m <sup>2</sup> g <sup>-1</sup> ] | Pore volume<br>[cm <sup>3</sup> g <sup>-1</sup> ] | Pore size<br>[nm] |
|------------------------------|---------------------------------------------------|---------------------------------------------------|-------------------|
| MSN                          | 747                                               | 1.54                                              | 8.27              |
| CaF <sub>2</sub> :Yb/Ho @MSN | 454                                               | 0.98                                              | 8.63              |

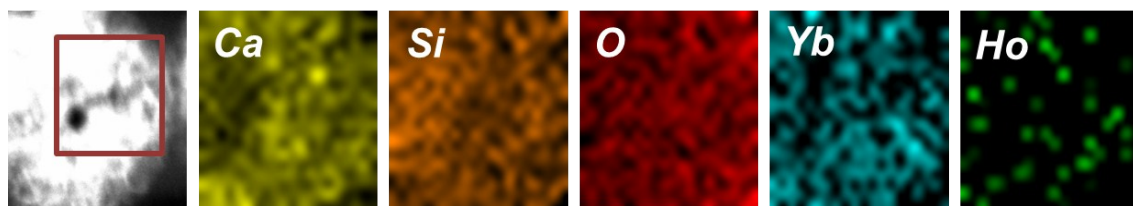

**Fig. S1** Elemental mapping images of an ultrathin section through part of CaF<sub>2</sub>: Yb/Ho@MSN.

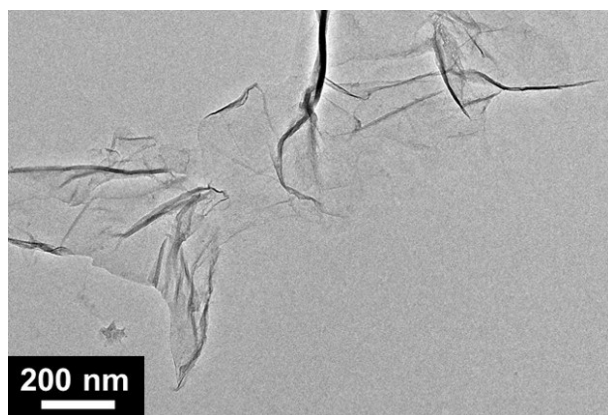

**Fig. S2** TEM image of GO film.

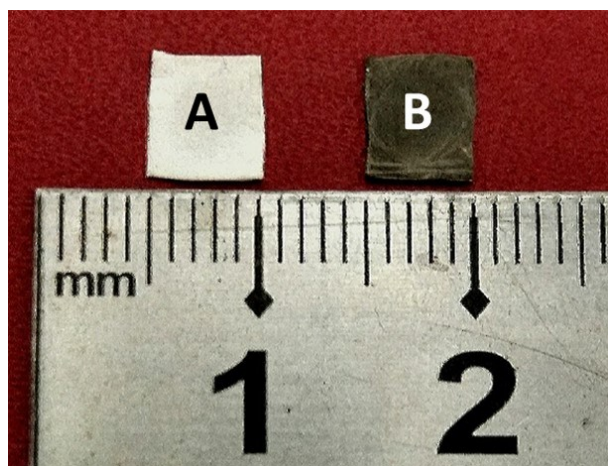

**Fig. S3** Optical photograph of TPU fiber membrane [A] and TPU@GO membrane [B]

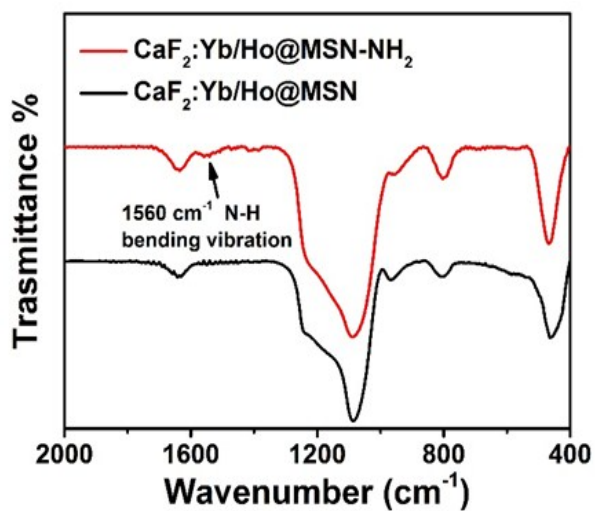

**Fig. S4** FTIR spectra of CaF<sub>2</sub>: Yb/Ho@MSN and CaF<sub>2</sub>: Yb/Ho@MSN modified with APTES.

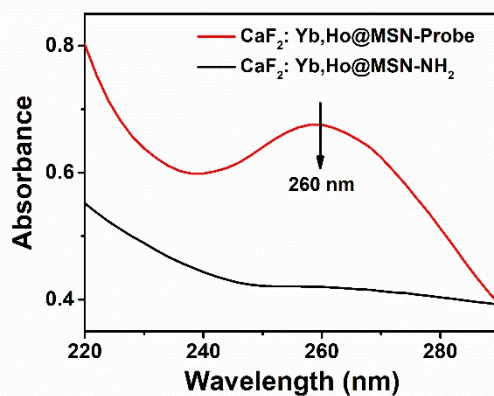

**Fig. S5** UV-vis absorption of CaF<sub>2</sub>: Yb/Ho@MSN modified with NH<sub>2</sub> and DNA probe.

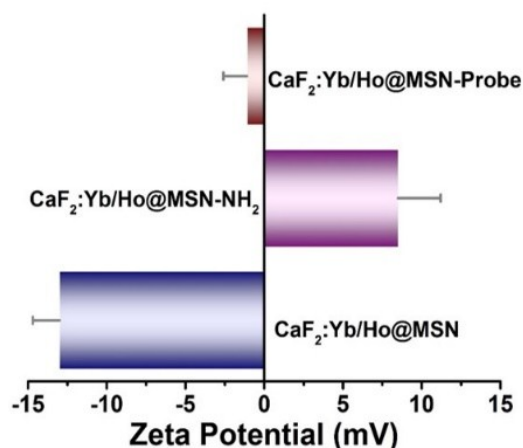

**Fig. S6**  $\zeta$ -potential of  $\text{CaF}_2$ : Yb/Ho@MSN,  $\text{CaF}_2$ : Yb/Ho@MSN modified with  $\text{-NH}_2$  and DNA probe.

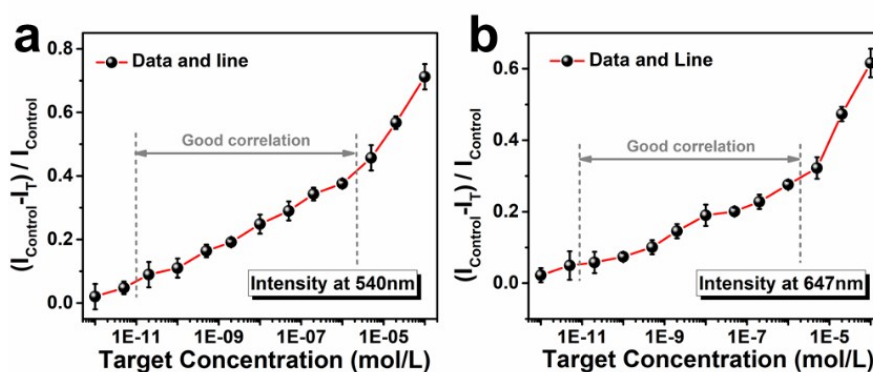

**Fig. S7** Representation of the maximum fluorescence relative intensity of the smart membrane measured at (a) 540nm and (b) 647nm as a function of the target miR-21 concentration.

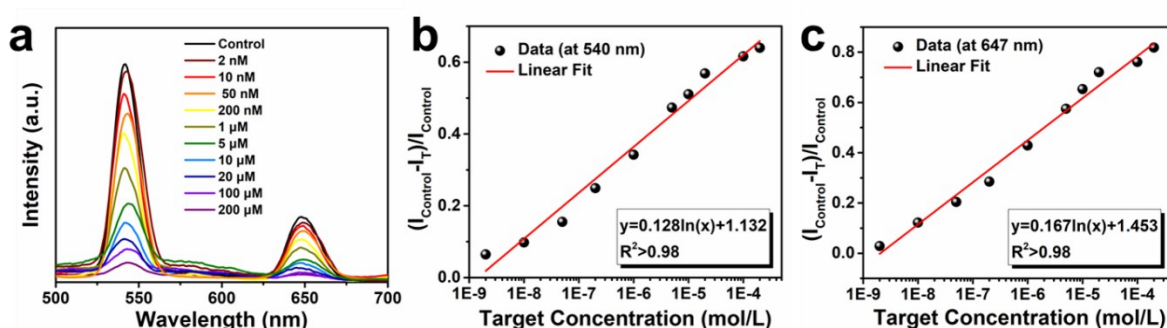

**Fig. S8** (a) UCL spectra of the smart membrane after treating with solutions with different miR-21 concentration in 10 vol% fetal bovine serum, and the relationship between the relative intensity of UCL, at (b) 540 nm and (c) 647 nm, and miR-21 concentration at a certain range.

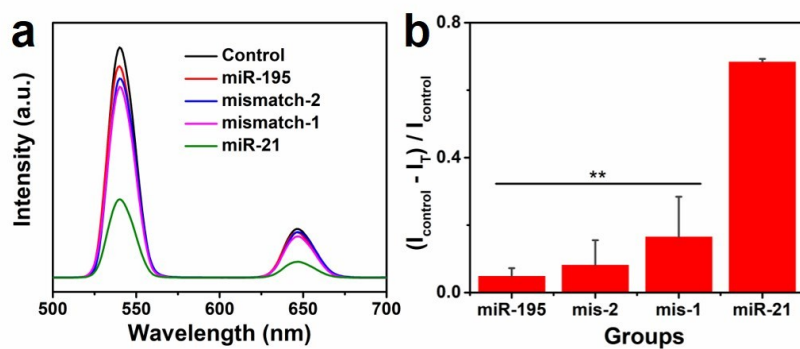

**Fig. S9** Specific detection of miR-21, miR-21 with single base mismatch, miR-21 with three base mismatch and miR-195. (a) UCL spectra of the smart membrane after treating with different samples at 1  $\mu\text{M}$ . (b) The relationship between the relative intensity of UCL and samples at 647 nm.
